# Supplementary material for: Human Gene Control by Vital Oncogenes: Revisiting a Theoretical Model and Its Implications for Targeted Cancer Therapy
Source: PubMed Central journal article supplement (PMC3269688; doi:10.3390/ijms13010316), 2011-12-27
Supplement: ijms-13-00316-s001.pdf [file ijms-13-00316-s001.pdf]

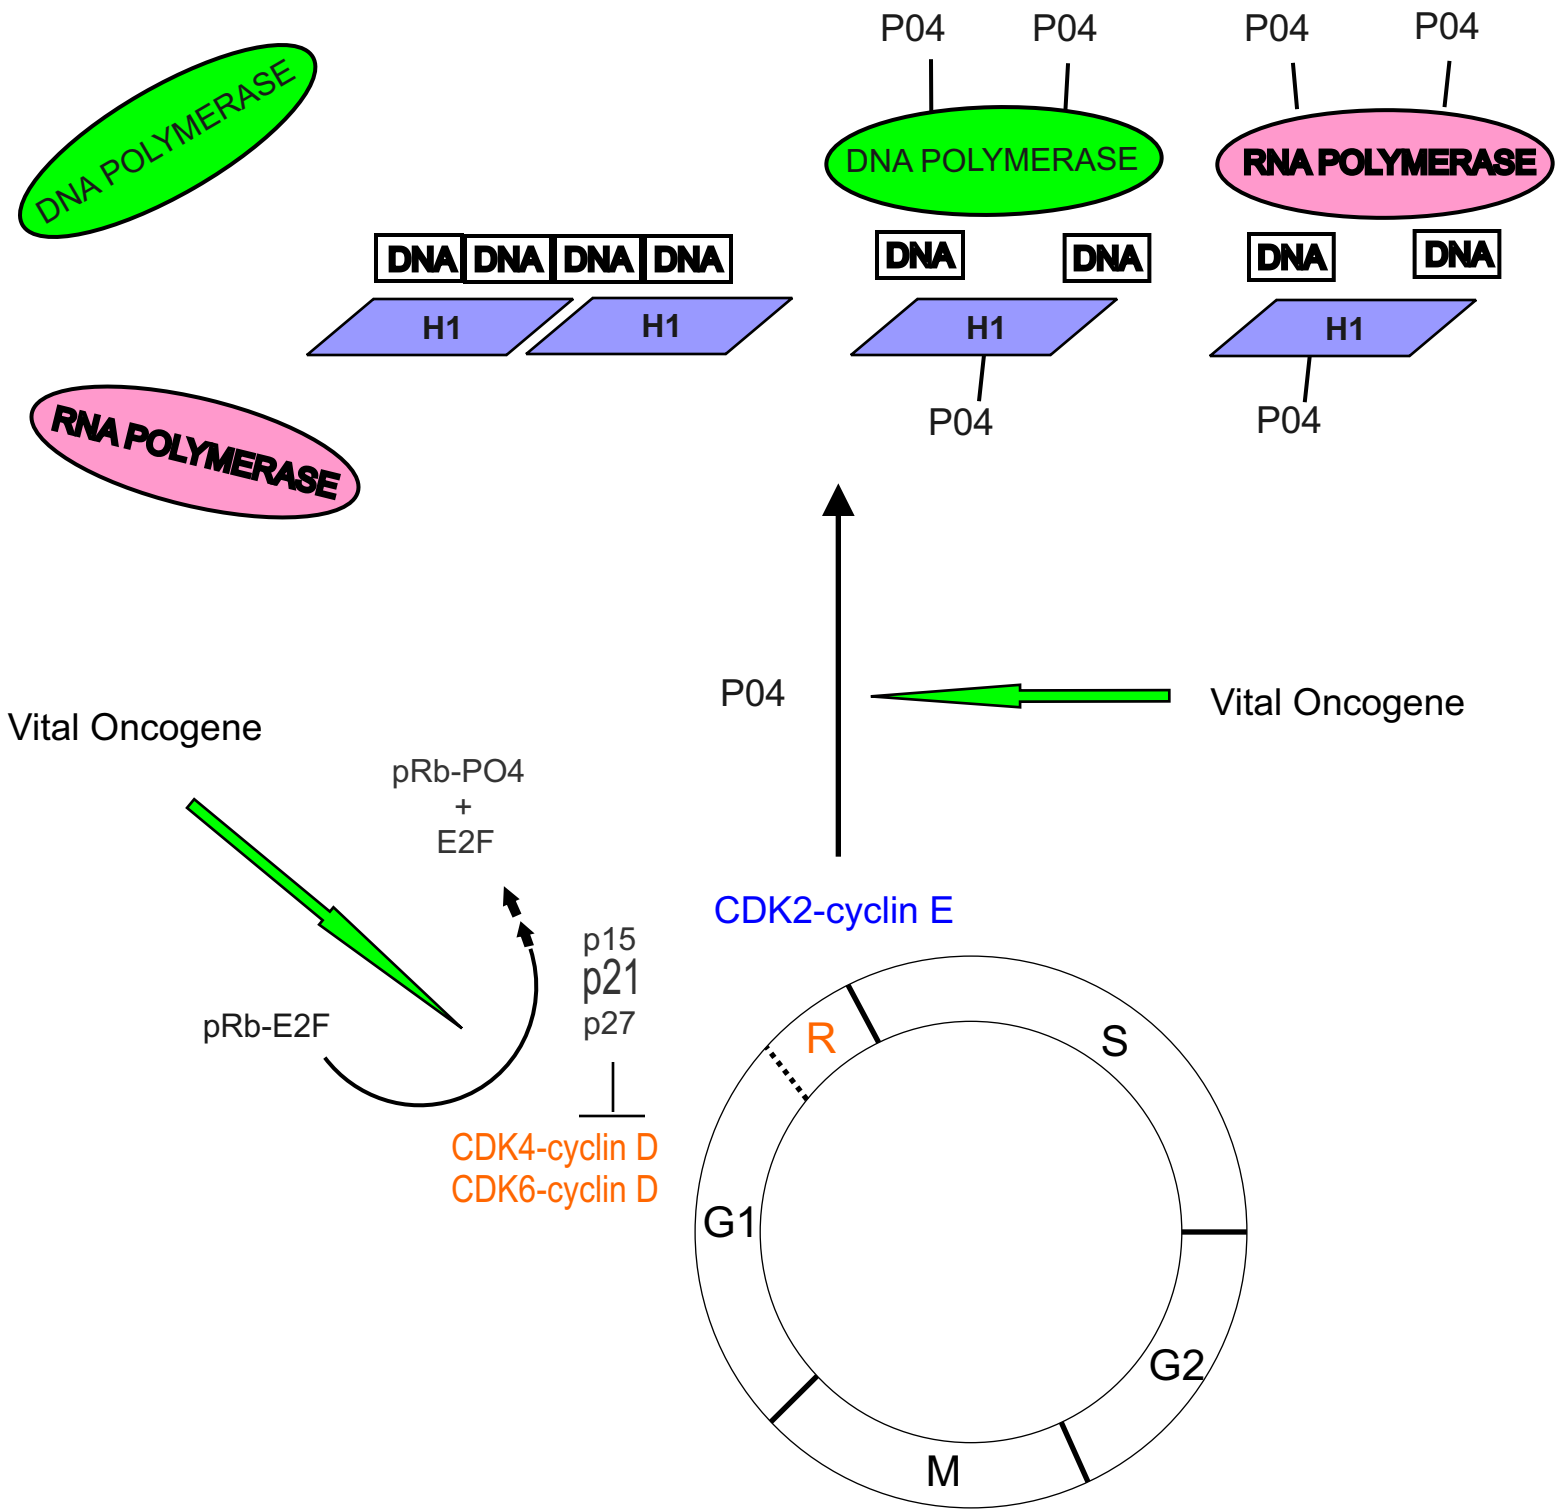

Figure 2
